# Supplementary material for: Benthic Respiration and Heavy Metal Benthic Fluxes in Artificial Shihwa Lake: Approaching In Situ Measurement
Source: MDPI journal article supplement (doi:10.3390/jmse11112186), 2023-11-17
Supplement: s1 [file s1]

**Table S1.** Comparison of the analytical results of heavy metals for nearshore Seawater Certified Reference Material (CASS-6; n=3) from National Institute Standard and Technology of USA with certified value.

| Elements | Certified value | Measured Value  | Recovery (%) |
|----------|-----------------|-----------------|--------------|
| Mn       | 2.22 ± 0.12     | 2.34 ± 0.08     | 105          |
| Fe       | 1.56 ± 0.12     | 1.68 ± 0.02     | 108          |
| Cr       | 0.10 ± 0.02     | 0.104 ± 0.012   | 104          |
| Co       | 0.067 ± 0.005   | 0.0711 ± 0.0005 | 106          |
| As       | 1.1 ± 0.1       | 1.000 ± 0.022   | 96           |
| Cd       | 0.022 ± 0.002   | 0.023 ± 0.000   | 105          |
| Pb       | 0.011 ± 0.004   | 0.0108 ± 0.0003 | 102          |
| Ni       | 0.42 ± 0.04     | 0.437 ± 0.004   | 104          |
| Cu       | 0.53 ± 0.03     | 0.558 ± 0.015   | 105          |
| Zn       | 1.27 ± 0.18     | 1.310 ± 0.033   | 103          |

**Table S2.** Factors loading for varimax rotated PCA of benthic fluxes.

| Elements                      | PC1   | PC2   |
|-------------------------------|-------|-------|
| Mn                            | 0.95  | -0.07 |
| Fe                            | 0.91  | -0.41 |
| Cr                            | -0.24 | 0.97  |
| Co                            | 0.97  | 0.03  |
| As                            | 0.11  | 0.88  |
| Cd                            | -0.30 | 0.95  |
| Pb                            | -0.12 | 0.40  |
| Ni                            | 0.85  | 0.27  |
| Cu                            | 0.19  | 0.92  |
| Zn                            | -0.42 | 0.80  |
| SOD                           | 0.96  | -0.26 |
| NH <sub>4</sub> <sup>+</sup>  | -0.92 | 0.17  |
| NO <sub>3</sub> <sup>-</sup>  | -0.83 | 0.01  |
| PO <sub>4</sub> <sup>3-</sup> | -0.35 | -0.93 |
| Si(OH) <sub>4</sub>           | -0.77 | 0.02  |
| % of variance                 | 46.1  | 36.3  |
| % of cumulative               | 46.1  | 82.4  |
